# Supplementary material for: Efficacy of Integrated Risk Score Using Omics-Based Biomarkers for the Prediction of Acute Rejection in Kidney Transplantation: A Randomized Prospective Pilot Study
Source: Int J Mol Sci. 2024 May 9;25(10):5139. doi: 10.3390/ijms25105139 (PMC11121528; doi:10.3390/ijms25105139)
Supplement: Supplementary file 1 [file ijms-25-05139-s001.zip › Supplementary File. Results of Biomarkers.xlsx]

## Sheet: Blood mRNA
Cutoff	0.477906		Targets: ARG1, MAPK9, OLR1
Transplant date	Group	Sex	Age	2 weeks	4 weeks	8 weeks	12 weeks	16 weeks	20 weeks	24 weeks	28 weeks	32 weeks	36 weeks	40 weeks	44 weeks	48 weeks
2018-07-26	2	1	71	0.594307	0.62826	0.503134	0.391854	0.318719	0.360767	0.467126	0.473175	0.556346	0.488473	0.418416	0.45024	0.370442
2018-12-20	1	2	46	0.623064	0.535298	0.488928	0.460404	0.463437	0.528406	0.379329	0.425543	0.211149		0.387388	0.387452	0.38712
2018-12-13	1	2	26	0.855403	0.815625	0.775912	0.715958	0.726779	0.673317	0.505844	0.28845	0.703239		0.374239	0.411212	0.354112
2018-09-06	1	1	63	0.633659	0.730364	0.773841	0.772383	0.642524	0.540828	0.433647	0.344025	0.40973	0.217546	0.425164	0.361212	0.322104
2018-10-04	1	2	39	0.531432	0.582076	0.5436	0.425419	0.3309	0.477131	0.274127	0.202924	0.231485	0.416716	0.397527	0.388421	0.321155
2018-05-03	1	1	55	0.68531	0.681005	0.634573	0.658552	0.719132	0.529169	0.676672	0.735272	0.414766	0.372452	0.267999	0.31633	0.176841
2018-05-10	1	2	36	0.486846	0.621994	0.504784	0.511327	0.368965	0.276888	0.335783	0.404272	0.331997	0.404965	0.431475	0.420283	0.397472
2018-05-10	2	2	65	0.535543	0.689452	0.656616	0.754445	0.174007	0.485693	0.27641	0.329315	0.445255	0.389154	0.471117	0.444008	0.493306
2018-05-31	2	2	54	0.757669	0.794229	0.833527	0.776368	0.698744	0.636106	0.277869	0.248343	0.289333	0.622922	0.479183	0.383336	0.358375
2018-06-21	2	1	68	0.754401	0.702959	0.769243	0.761577	0.753665	0.712198	0.612369	0.846775	0.796671	0.839304	0.79439	0.337867	0.403878
2018-06-30	2	1	56	0.534373	0.444219	0.741278	0.487014	0.399946	0.449405	0.389301	0.413484	0.422562	0.461101	0.60669	0.445107	0.367649
2018-07-11	2	1	54	0.812634	0.612461	0.561135	0.682279	0.529335	0.363439	0.463617	0.353353	0.544807	0.358076	0.378171	0.662648	0.689392
2018-08-09	1	2	51	0.520285	0.824423	0.662549	0.381873	0.355251	0.433592	0.3284	0.408169	0.396087	0.508584	0.305737	0.383178	0.347405
2018-09-06	1	2	43	0.37922	0.552214	0.621867	0.49165	0.224025	0.357462	0.301136	0.27903	0.366814	0.17085	0.211471	0.210085	0.239658
2018-09-27	1	2	57	0.626303	0.723791	0.821291	0.81234	0.839783	0.746643	0.5136	0.602261	0.52762	0.419465	0.57034	0.367046	0.394112
2018-10-17	1	1	61	0.354155	0.448911	0.547061	0.519094	0.434275	0.349258	0.779528	0.265228	0.786119	0.432469	0.315883	0.327452	0.312413
2018-11-20	2	1	58	0.537637	0.610109	0.80471	0.929906	0.735149	0.538505	0.75762	0.616547	0.692372	0.594016	0.544547	0.421745	0.321232
2018-12-06	2	2	59	0.634819	0.674409	0.614273	0.397373	0.345358	0.241559	0.23809	0.277811	0.295276	0.472354	0.475421	0.374575	0.333455
2019-01-31	2	1	52	0.725893	0.783546	0.824317	0.63833	0.720477	0.818056	0.761125	0.823811	0.497287	0.494223	0.494545	0.378457	0.342323
2019-01-24	2	1	45	0.365585	0.367766	0.482428	0.574597	0.453471	0.454398	0.3158	0.422101	0.487549	0.511232	0.412327	0.401217	0.377645
2019-02-08	1	1	56	0.439583	0.344157	0.329745	0.309037	0.282113	0.291698	0.567248	0.478784	0.464259	0.424723	0.345459	0.394512	0.378646
2019-02-21	1	2	38	0.795203	0.707692	0.684678	0.76263	0.567699	0.43204	0.454325	0.444521	0.454212	0.457423	0.424344	0.388875	0.373455
2019-03-07	2	1	23	0.287324	0.581064	0.689214	0.491894	0.859748	0.404316	0.517502	0.452234	0.487487	0.474231	0.445674	0.434541	0.401231
2019-03-14	2	1	59	0.819712	0.797413	0.853579	0.840726	0.88893	0.56829	0.465424	0.47845	0.479846	0.601242	0.479955	0.374413	0.435235
2019-03-28	2	2	58	0.729933	0.682389	0.806771	0.841477	0.832617	0.71036	0.424325	0.432124	0.476541	0.412121	0.456542	0.434542	0.436879
2019-03-28	2	1	43	0.776039	0.811064	0.738033	0.720959	0.713238	0.635066	0.444433	0.464224	0.499543	0.435843	0.592321	0.393875	0.42664
2019-04-09	1	2	66	0.695338	0.791947	0.864177	0.646093	0.537043		0.485543	0.452233	0.444522	0.430003	0.378455	0.367451	0.343355
2018-12-11	2	2	59	0.6623	0.626685	0.652164	0.38606	0.485804	0.569084	0.375211	0.340178	0.478743	0.424212	0.512313	0.412127	0.466653
2019-01-03	1	2	49	0.829507	0.854944	0.625808	0.666142	0.621188	0.437182	0.400812	0.518386	0.437706	0.404512	0.411312	0.421432	0.378878
2018-12-06	2	1	40	0.727547	0.737997	0.589032	0.799248	0.364809	0.503348	0.420599	0.348444	0.294821	0.415288	0.397213	0.441132	0.379679
2018-12-17	2	1	55	0.672351	0.709361	0.580221	0.555186	0.549761	0.462695	0.571626	0.516386	0.782433	0.464212	0.380012	0.371212	0.443334
2019-01-16	2	2	55	0.7386	0.780441	0.60118	0.473343	0.598636	0.457854	0.383748	0.765968	0.433547	0.411132	0.375421	0.368741	0.472232
2019-01-24	2	1	19	0.759004	0.69097	0.57723	0.538994	0.296738	0.314298	0.30235	0.149574	0.474522	0.424532	0.462324	0.401217	0.399932
2019-02-08	1	2	57	0.565795	0.700876	0.349809	0.223123	0.19291	0.433025	0.466786	0.450122	0.489545	0.438242	0.415232	0.364127	0.412312
2018-11-07	1	2	47	0.608617	0.827176	0.797044	0.793646	0.680487	0.643106	0.548948	0.726442	0.595753	0.450203	0.398764	0.375453	0.309851

## Sheet: Urinary exosome miRNA
Cutoff	0.64971		Targets: miR-21-5p, miR-31-5p, miR-4532
Transplant date	Group	Sex	Age	2 weeks	4 weeks	8 weeks	12 weeks	16 weeks	20 weeks	24 weeks	28 weeks	32 weeks	36 weeks	40 weeks	44 weeks	48 weeks
2018-07-26	2	1	71	0.616127	0.0244883	0.514679	0.0667818	0.184821	0.119499	0.117782	0.153889	0.148499	0.389756	0.270409	0.267417	0.233252
2018-12-20	1	2	46	0.0558616	0.322503	0.178235	0.181231	0.350345	0.143093	0.140365	0.732968	0.687751	0.345676	0.352334	0.464353	0.555231
2018-12-13	1	2	26	0.42611	0.380296	0.235614	0.520349	0.0571125	0.105693	0.200872	0.265076	0.119896	0.376668	0.343345	0.487421	0.445551
2018-09-06	1	1	63	0.292476	0.132432	0.492166	0.811575	0.658639	0.146775	0.191212	0.239688	0.0830497	0.136059	0.114975	0.354545	0.512336
2018-10-04	1	2	39	0.499545	0.228584	0.149499	0.113411	0.228573	0.207426	0.0773883	0.323115	0.100968	0.0513384		0.376757	0.544534
2018-05-03	1	1	55	0.806764	0.399185	0.42688	0.166349	0.181366	0.682546		0.668116	0.430397	0.322078	0.507981	0.703283	0.705774
2018-05-10	1	2	36	0.721261	0.321142	0.60688	0.167726	0.182036	0.737721	0.575983	0.72221	0.221471	0.172819	0.323571	0.337212	0.41928
2018-05-10	2	2	65	0.141856	0.194412	0.310436	0.308115	0.109302	0.0418889	0.0898999	0.11831	0.355372	0.190437	0.333376	0.0614785	0.151392
2018-05-31	2	2	54	0.241317	0.549741	0.516384	0.21465	0.554819	0.352127	0.146561	0.177301	0.791755	0.199667	0.184772	0.169786	0.200829
2018-06-21	2	1	68	0.842968	0.661475	0.214197	0.544745	0.246154	0.385119	0.343667	0.273993	0.0529253	0.423153	0.308307	0.418701	0.654169
2018-06-30	2	1	56	0.0914001	0.241185	0.129964	0.394594	0.221834	0.297171	0.736093	0.0591341	0.124599	0.733243	0.728116	0.308225	0.621115
2018-07-11	2	1	54	0.213616	0.645649	0.343809	0.0907655	0.117999	0.210986	0.273912	0.0312446	0.161946	0.161047	0.106472	0.14406	0.0361269
2018-08-09	1	2	51	0.481087	0.215814	0.214523	0.144888	0.3293	0.546394	0.184374	0.198294	0.345574	0.105647	0.525554	0.161455	0.485201
2018-09-06	1	2	43	0.816845	0.491647	0.67177	0.30783	0.186463	0.11727	0.163663	0.31426	0.706308	0.372313	0.135653	0.431475	0.413234
2018-09-27	1	2	57	0.662466	0.178105	0.164482	0.407343	0.812194	0.126189	0.607384	0.245239	0.376982	0.428639	0.274211	0.605738	0.442059
2018-10-17	1	1	61	0.490723	0.460596	0.711103	0.0370073	0.821978	0.628884	0.577949	0.734487	0.0696266	0.848473	0.571785	0.444345	0.405872
2018-11-20	2	1	58	0.601675	0.877082	0.240991	0.728233	0.789795	0.804988	0.514896	0.680076	0.854733	0.835464	0.322313	3.78576	0.544233
2018-12-06	2	2	59	0.528143	0.753143	0.243577		0.101534	0.470133	0.0640132	0.494399	0.165093	0.30137	0.311123	0.167417	0.232433
2019-01-31	2	1	52	0.356977	0.112644	0.042775	0.349026	0.0613065	0.805078	0.0682586	0.344083	0.333232	0.343567	0.334457	0.177677	0.123135
2019-01-24	2	1	45	0.693252	0.680507	0.144377	0.370378	0.315548		0.12495	0.203297	0.298676	0.387435	0.332452	0.212335	0.222333
2019-02-08	1	1	56	0.202191	0.230909	0.198312	0.148011	0.196981	0.130768	0.344404	0.382729	0.356779	0.321213	0.363444	0.456646	0.481211
2019-02-21	1	2	38	0.094276	0.245283	0.254129	0.0824965	0.885313	0.163197	0.387455	0.312434	0.364424	0.312344	0.312312	0.489897	0.521211
2019-03-07	2	1	23	0.878385	0.400098	0.210216	0.898957	0.089688	0.843816	0.923754	0.333433	0.312324	0.333346	0.344343	0.157646	0.456678
2019-03-14	2	1	59	0.31103	0.46483	0.156641	0.204309	0.114578	0.227457	0.251212	0.354343	0.390089	0.354423	0.312344	0.232436	0.312324
2019-03-28	2	2	58	0.146994	0.0720544	0.0491079	0.0311458	0.0307717	0.060303	0.284541	0.367876	0.300968	0.321231	0.366454	0.226545	0.355345
2019-03-28	2	1	43	0.111277	0.343072	0.298373	0.0490603	0.531231	0.0470517	0.323324	0.312334	0.272343	0.343278	0.345534	0.106757	0.351243
2019-04-09	1	2	66	0.576788	0.64015	0.362656	0.642084	0.707772		0.354343	0.336755	0.311232	0.312334	0.322233	0.376768	0.474821
2018-12-11	2	2	59	0.241637	0.314987	0.0370054	0.0308955	0.0719049	0.10058	0.136683	0.0449401	0.354341	0.30988	0.312347	0.123335	0.365232
2019-01-03	1	2	49	0.196741	0.22226	0.228473	0.101002	0.218628	0.190317	0.396922	0.348566	0.302123	0.414137	0.332342	0.387567	0.482122
2018-12-06	2	1	40	0.123639	0.0308664	0.123458	0.100024	0.373069	0.28241	0.177892	0.424381	0.802725	0.839796	0.365646	0.234544	0.223327
2018-12-17	2	1	55	0.469717	0.139849	0.225	0.0675525	0.0503247	0.0198956	0.020662	0.0368715	0.0182503	0.423345	0.302357	0.205676	0.366553
2019-01-16	2	2	55	0.221844	0.522315	0.443626	0.257463	0.15957	0.558509	0.447937	0.677805	0.344543	0.396757	0.382123	0.162334	0.324345
2019-01-24	2	1	19	0.146041	0.136283	0.41416	0.694877	0.136318	0.416738	0.668223	0.692589	0.354345	0.324345	0.377567	0.181513	0.312434
2019-02-08	1	2	57	0.367402	0.223174		0.422895	0.710256	0.586091	0.36888		0.312315	0.343455	0.312313	0.424342	0.512334
2018-11-07	1	2	47	0.190351	0.760772	0.57811	0.453015	0.501111	0.220869	0.174023	0.0493404	0.259066	0.166122	0.354544	0.433455	0.534423

## Sheet: Urinary mRNA
Cutoff	0.408887		Targets: C1QB, CD3e, CXCL-9, IP-10, PSMB9, Tim-3
Transplant date	Group	Sex	Age	2 weeks	4 weeks	8 weeks	12 weeks	16 weeks	20 weeks	24 weeks	28 weeks	32 weeks	36 weeks	40 weeks	44 weeks	48 weeks
2018-07-26	2	1	71	0.0945285	0.00844893	0.0232053	0.00148368	0.00975529	0.00448058	0.0138436	0.002706	0.310159	0.712273	0.891442	0.223028	0.428649
2018-12-20	1	2	46	0.00756891	0.0206991	0.116363	0.501476	0.896812	0.974888	0.592526	0.995681	0.995097	0.134491	0.408303	0.300057	0.357799
2018-12-13	1	2	26	0.000153547	0.000157166	0.00191008	0.0262463	0.0922773	0.078055	0.016951	0.854053	0.0707879	0.119085	0.454325	0.402006	0.384213
2018-09-06	1	1	63	0.00221017	0.0961307	0.0101764	0.00167736	0.00724637	0.391832	0.0370951	0.00348488	0.874074	0.0172843	0.330149	0.212132	0.333234
2018-10-04	1	2	39	0.0137841	0.000153447	0.000297405	0.000434938	0.00668521	0.000136906	0.0275464	0.00130097	0.109726	0.0235637	0.444324	0.13454	0.323124
2018-05-03	1	1	55	0.00505365	0.034316	0.0769364	0.0693832	0.044373	0.0485598	0.00368688	0.0165691	0.0077516	0.20554	0.847947	0.0995996	0.108198
2018-05-10	1	2	36	0.00403424	0.359244	0.134463	0.0387082	0.044175	0.00613129	0.00260514	0.00489311	0.00882913	0.140424	0.645591	0.771611	0.726514
2018-05-10	2	2	65	0.452099	0.112927	0.237086	0.0979355	0.0641965	0.0072514	0.0137005	0.000694475	0.00125296	0.00164312	0.804774	0.0399357	0.0493568
2018-05-31	2	2	54	0.00207674	0.00171997	0.000802093	0.0257651	0.000373854	0.000457161	0.000290554	0.0356459	0.00332566	0.0120808	0.0012199	0.0414301	0.0176365
2018-06-21	2	1	68	0.0954725	0.0116498	0.0140531	0.0110718	0.00536601	3.84444e-06	0.000647924	0.00185775	0.0960248	0.180633	0.167359	0.264903	0.944444
2018-06-30	2	1	56	0.00706365	0.0348551	0.0217863	0.0575696	0.0140166	0.00130771	0.0020582	0.0477118	0.779366	0.393285	0.0084948	0.318872	0.881071
2018-07-11	2	1	54	0.0216884	0.0332975	0.332712	0.0104136	0.0186023	0.68082	0.0479268	0.0206448	0.411533	0.465475	0.978076	0.450002	0.250738
2018-08-09	1	2	51	0.0961387	0.168174	0.0284344	0.188903	0.00304972	0.135537	0.245053	0.0422692	0.156426	0.310504	0.161048	0.605865	0.545743
2018-09-06	1	2	43	0.090595	0.020703	0.979226	0.000459496	0.0664305	0.0858138	0.0102644	0.0578273	0.000676436	0.00133225	0.737752	0.0177028	0.0507409
2018-09-27	1	2	57	0.0158305	0.00963705	0.0205865	0.00785519	0.0132253	0.0843169	0.00768886	0.0146662	0.00109019	0.0688541	0.720538	0.00550652	0.399868
2018-10-17	1	1	61	0.0210516	3.37002e-05	0.995353	0.00262327	0.0991098	0.0343736	0.00110197	0.00778767	0.0174893	0.135174	0.393618	0.54454	0.322124
2018-11-20	2	1	58	0.00789818	0.00292438	0.0369845	0.0972893	0.803445	0.0239206	0.938286	0.0845768	0.023655	0.370578	0.475228	0.212322	0.400213
2018-12-06	2	2	59	5.54587e-05	0.000474042	0.114419	0.0800536	0.00141675	0.097088	0.042571	0.0150286	0.384587	0.352518	0.402133	0.245466	0.482353
2019-01-31	2	1	52	0.999427	0.00171725	0.0114261	0.00107943	0.0365466	0.000296825	0.0186341	0.392612	0.287121	0.363423	0.412123	0.233435	0.322433
2019-01-24	2	1	45	0.359524	0.882036	0.355425	0.222323	0.0585375	0.279963	0.841098	0.289566	0.292449	0.332125	0.334375	0.185451	0.384512
2019-02-08	1	1	56	0.00336623	0.28284	0.0247209	0.0981146	0.0310227	0.452308	0.285345	0.185662	0.242447	0.143434	0.433238	0.333431	0.300232
2019-02-21	1	2	38	0.0110174	0.264314	0.545793	0.102901	0.94796	0.0091847	0.242353	0.214526	0.254434	0.109085	0.412343	0.312312	0.298122
2019-03-07	2	1	23	0.00226459	0.110346	0.471946	0.256146	0.930919	0.101262	0.521396	0.238755	0.271212	0.322333	0.375228	0.200121	0.400812
2019-03-14	2	1	59	0.381371	0.0143692	0.00236811	0.189049	0.150534	0.12381	0.233434	0.298756	0.256542	0.376745	0.405212	0.192121	0.412334
2019-03-28	2	2	58	0.0330456	0.00570361	0.00403919	0.866122	0.128077	0.0220277	0.295127	0.244335	0.312321	0.378423	0.412858	0.212324	0.398524
2019-03-28	2	1	43	0.0364329	0.120383	0.649448	0.956045	0.015578	0.718737	0.277445	0.233545	0.334542	0.343233	0.421231	0.228751	0.432452
2019-04-09	1	2	66	0.00506076	0.000495002	0.609653	0.239589	0.0832756		0.255653	0.238454	0.233122	0.122322	0.392122	0.282123	0.312123
2018-12-11	2	2	59	0.954371	0.418932	0.0732216	0.00558854	0.00211206	0.58303	0.103677	0.160006	0.292449	0.385645	0.375421	0.253424	0.415586
2019-01-03	1	2	49	0.79696	0.667257	0.106564	0.0193727	0.956668	0.98071	0.101467	0.0974322	0.222332	0.123449	0.408121	0.322123	0.300035
2018-12-06	2	1	40	0.496201	0.010526	0.904831	0.50766	0.0316631	0.0345017	0.992008	0.93758	0.814173	0.684177	0.374121	0.191213	0.401212
2018-12-17	2	1	55	0.718001	0.110078	0.170738	0.171548	0.00561266	0.763717	0.63621	0.898988	0.100412	0.311225	0.422354	0.200021	0.387429
2019-01-16	2	2	55	0.0302452	0.00380198	0.000138605	0.000129597	0.621578	0.487758	0.812806	0.811664	0.322122	0.332312	0.405223	0.192121	0.444865
2019-01-24	2	1	19	0.548497	0.429739	0.00123669	0.0545654	0.970622	0.99773	0.998307	0.968139		0.345455	0.404841	0.212334	0.412314
2019-02-08	1	2	57	0.00384849	0.0143214	0.0185598	0.93141	0.948278	0.958802			0.254346	0.113113	0.415121	0.254545	0.312312
2018-11-07	1	2	47	0.00277468	0.00230111	0.000336049	0.0162625	0.00799249	0.00338195	0.324967	0.171167	0.424965	0.129085	0.433432	0.284512	0.323121

## Sheet: Urine exosome hemopexin
Cutoff	1		Target: Hemopexin
Transplant date	Group	Sex	Age	2 weeks	4 weeks	8 weeks	12 weeks	16 weeks	20 weeks	24 weeks	28 weeks	32 weeks	36 weeks	40 weeks	44 weeks	48 weeks
2018-07-26	2	1	71	1.97	1.87	1.42	1.42	0.86	0.97	0.99	0.99	0.99	0.77	0.69	0.49	0.89
2018-12-20	1	2	46	1.15	1.05	1	1.1	0.87	0.45	0.4	0.4	0.4	0.4	0.3	0.5	0.4
2018-12-13	1	2	26	1.13	1.03	1	1.02	1.22	0.56	0.36	1.06	1.06	0.63	0.43	0.33	0.23
2018-09-06	1	1	63	1.11	1.01	0.88	0.68	0.48	0.3	0.28	0.28	0.28	0.28	0.38	0.33	0.43
2018-10-04	1	2	39	1.11	1.1	1	1	1.02	0.75	1.01	1.01	1.01	0.89	0.56	0.36	0.24
2018-05-03	1	1	55	0.34	0.24	0.91	0.3	0.13	0.04	0.07	0.4	0.1	0.06	0.19	0.03	0.06
2018-05-10	1	2	36	1.17	0.38	0.65	0.09	0.22	0.02	0.01	0.21	0.66	0.72	0.51	1.6	1.13
2018-05-10	2	2	65	0.95	0.13	0.78	0.34	0.19	1.46	0.19	0.02	0.03	0.4	0.24	0.14	0.03
2018-05-31	2	2	54	1.27	0.7	0.78	0.57	0.11	0.09	0.22	0.29	0.02	0.07	0.26	0.02	0.12
2018-06-21	2	1	68	0.57	0.43	0.39	0.24	0.86	0.22	0.23	0.76	0.62	0.46	0.94	0.04	0.29
2018-06-30	2	1	56	0.08	0.01	0.03	0.02	0.22	0.16	0.02	0.32	0.53	0.35	0.12	0.02	0.04
2018-07-11	2	1	54	0.03	0.51	0.03	2.97	0.1	0.04	0.08	0.09	0.12	0.17	1.02	1.02	1.03
2018-08-09	1	2	51	1.99	0.76	0.88	0.08	0.27	3.12	2.47	2	1.3	0.05	1.32	1.33	1.38
2018-09-06	1	2	43	1.91	0.37	0.12	3.16	0.23	0.29	0.45	0.15	0.18	0.22	0.03	0.07	0.07
2018-09-27	1	2	57	0.48	0.04	0.03		2.2	0.25	0.97	0.91	0.6	2.08	1.58	0.07	0.07
2018-10-17	1	1	61			0.58	0.04	0.72	0.06	0.08	0.05	0.1	0	0.02	0.02	0.432733
2018-11-20	2	1	58	1.19	0.85	0.33	0.45	1.55	0.55	0.76	0.92	1.26	1.08	0.83	0.74	0.417333
2018-12-06	2	2	59	0.09	0.99	1.01	1.24	0.75	0.79	0.57	0.13	0.84	0.92	0.92	0.89	0.727333
2019-01-31	2	1	52	0.38	0.48	0.33	0.05	0.14	0.06	0.13	0.12	0.48215	0.465	0.5	0.432	0.427333
2019-01-24	2	1	45	2.55	1.33	0.98	0.94	0.11	0.52	0.55	0.65	0.499091	0.4435	0.515	0.402133	0.486273
2019-02-08	1	1	56	2.27	0.07	0.03	0	0.23		0.07	0.456	0.532329	0.486457	0.450545	0.412344	0.412733
2019-02-21	1	2	38	0.23	0.02	0.09	0.32	0.96	0.95	0.385	0.376437	0.512339	0.49665	0.512	0.487444	0.467333
2019-03-07	2	1	23	0.58	0.24	0.08	0.03	0.46	0.48	0.31	0.456767	0.478452	0.46	0.5321	0.344444	0.327333
2019-03-14	2	1	59	0.22	0.03	0.05	0.02	0.05	0.01	0.425	0.446667	0.488751	0.485	0.445505	0.423444	0.375273
2019-03-28	2	2	58	0.54	0.43	0.65	0.38	0.42	0.35	0.315	0.466667	0.534329	0.49	0.522325	0.544444	0.467733
2019-03-28	2	1	43	0.63	0.38	0.03	0.22	0.04	0.04	0.115	0.346667	0.461214	0.443	0.485251	0.423214	0.389653
2019-04-09	1	2	66	1.35	0.06	0.7	0.07	0.1		0.415	0.146667	0.478691	0.423	0.512505	0.486454	0.455233
2018-12-11	2	2	59	0.04	0.02	0.45	0.09	0.05	0.01	0.13	0.06	0.484521	0.456	0.512324	0.486756	0.427333
2019-01-03	1	2	49	1.34	1.03	1.3	0.06	0.2	0.1	0.215	0.75	0.02	0.21	0.33	0.364444	0.327333
2018-12-06	2	1	40	1.24	0.83	0.91	0.43	0.28	0.1	0.64	0.09	0.72	0.09	0.08	0.344444	0.327333
2018-12-17	2	1	55	0.85	0.68	0.07	0.11	0.05	0.19	0.3	0.18	0.12	0.32	0.21	0.404444	0.382127
2019-01-16	2	2	55	0.2	0.4	1.04	1.85	0.92	0.11	0.25	0.13	0.434445	0.431	0.523141	0.486754	0.447333
2019-01-24	2	1	19	1.36	1.3	0.01	0.03	1.31	0.56	0.01	0.08	0.553409	0.468	0.512312	0.496444	0.457333
2019-02-08	1	2	57	3.77	2.69	1.47			0.7	0.815	0.846667	0.489091	0.4435	0.52	0.48	0.427333
2018-11-07	1	2	47	0.36	0.43	0.03	0.21	0.04	0.07	0.07	0.01	0.02	0.06	0.16	0.382344	0.392123

## Sheet: Urine exosome tetraspanin-1
Cutoff	1		Target: Tetraspanin-1
Transplant date	Group	Sex	Age	2 weeks	4 weeks	8 weeks	12 weeks	16 weeks	20 weeks	24 weeks	28 weeks	32 weeks	36 weeks	40 weeks	44 weeks	48 weeks
2018-07-26	2	1	71	1.89	1.55	0.98	0.78	0.38	0.46	0.76	0.76	0.15	0.13	0.1	0.21	0.1
2018-12-20	1	2	46	1.65	1.88	1.32	1.12	1.12	0.34	1.33	0.52	0.23	0.42	0.22	0.2	0.24
2018-12-13	1	2	26	1.95	1.43	0.94	0.9	0.94	0.43	0.22	0.22	0.23	0.24	0.24	0.22	0.22
2018-09-06	1	1	63	1.77	1.46	1.54	1.57	0.57	0.64	1.44	1.12	1.04	0.75	0.43	0.45	0.35
2018-10-04	1	2	39	1.85	1.69	1.89	1.69	1.83	0.87	0.65	0.65	0.65	0.53	0.33	0.34	0.31
2018-05-03	1	1	55	0.48	0.18	1.72	0.43	0.47	1.06	1.93	0.09	0.37	0.27	0.54	0.36	0.32
2018-05-10	1	2	36	1.58	1.29	1.49	0.39	0.8	2.69	0.39	0.22	0.63	3.08	2.64	2	1.07
2018-05-10	2	2	65	1.56	1.26	1.35	0.55	3.75	2.31	0.27	0.28	0.18	1.71	1.42	2.28	0.25
2018-05-31	2	2	54	2.12	3.05	0.04	0.31	0.67	0.17	0.41	0.14	0.58	0.69	0.83	0.61	0.11
2018-06-21	2	1	68		4.21	0.02	0.01	1.31	0.73	0.34	3.36	1.8	2.38	1.53	0.24	0.69
2018-06-30	2	1	56	4.8	0.28	1.52	1.09	0	0.6	0.35	1.86	1.42	2.72	0.84	0.4	0.36
2018-07-11	2	1	54	0.21	0.39	0.9	1.96	0.23	0.08	1.65	3.22	2.51	0.66	1.28	1.31	1.08
2018-08-09	1	2	51	3.91	3.5	0.4	3.82	1.4	2.58	3.11	4.05	1.65	0.93	1.24	1.51	1.69
2018-09-06	1	2	43	4.9	3.73	0.22	1.08	3.26	1.78	1.98	2.3	1.44	0.6	0.63	1.68	1.69
2018-09-27	1	2	57	3.08	0.37	1.07		1.46	1.4	1.35	0.91	1.26	0.61	0.49	0.21	0.31
2018-10-17	1	1	61	0.34	0.6	2.71	1.63	1.49	2.34	2.75	2.69	1.14	0.36	0.41	0.33	0.53
2018-11-20	2	1	58	2.38	3.52	2.91	2.17	3.1	1.81	2.29	3.06	1.59	1.47	0.47	0.31	0.24
2018-12-06	2	2	59	0.08	0.31	3.75	0.46	1.79	0.88	0.37	0.4	0.58	0.44	0.44	0.44	0.43
2019-01-31	2	1	52	2.23	1.27	1.87	1.17	1.95	3.3	0.27	0.31	0.22	0.12	0.32	0.55	0.42
2019-01-24	2	1	45	1.84	3.35	1.61	1.43	1.72		1.29	0.93	0.5	0.35	0.45	0.54	0.4
2019-02-08	1	1	56	4.84	2.7	1.09	0.83	2.26		0.48	1.2037	0.88	0.84	0.88	0.8	0.93
2019-02-21	1	2	38	0.95	0.41	0.2	0.66	0.85	0.68	1.35	1.31037	0.98	1.12	1.1	1.15	1.2
2019-03-07	2	1	23	4.88	3.62	2.4	0.85	3.92	2.92	0.52	1.15404	1.15	1.1	1.35	1.1	0.84
2019-03-14	2	1	59	2.64	0.64	0.73	0.29	1.05	0.17	0.982	1.11104	1.11	1.12	1.09	1.05	0.7
2019-03-28	2	2	58	0.94	1.41	1.29		0.64	0.23	0.871429	1.4213	1.33	1.23	1.22	0.98	0.65
2019-03-28	2	1	43	4.84	1.99	0.21	0.58	0.23	0.2	1.07	1.9101	1.54	1.34	1.35	1.45	0.87
2019-04-09	1	2	66	1.83	1.21	3.08	3.79	2.66		1.221	1.51104	0.9	0.93	0.8	0.91	0.8
2018-12-11	2	2	59	0.99	0.61	1.45	1.13	0.73	0.25	0.05	0.07	0.3	0.5	0.8	0.75	0.45
2019-01-03	1	2	49	3.13	2.71	1.34	0.22	0.24	0.24	1.17821	0.91	0.1	0.63	0.72	0.65	0.75
2018-12-06	2	1	40	4.75	4.05	4.77	2.5	2.56	1.31	3.31	1.4	1.4	1.38	1.1	1.15	0.59
2018-12-17	2	1	55	3.93	5.81	3.59	4.91	2.47	2.13	1.62	1.93	2.28	1.93	1.8	1.45	1.1
2019-01-16	2	2	55	0.89	0.8	1.25	1.55	0.27	0.9	0.63	0.9	0.87	0.6	0.4	0.31	0.23
2019-01-24	2	1	19	3.44	3.58	0.31	0.23	0.68	0.26	0.11	0.15	0.66	0.6	0.5	0.24	0.15
2019-02-08	1	2	57	2.99	3.44	2.06			0.95	1.21782	0.81037	0.86	0.98	0.99	0.9	0.8
2018-11-07	1	2	47	0.85	0.82	0.48	0.93	1	0.29	0.32	0.23	0.25	0.32	0.75	0.76	0.64
