# Supplementary figures and images for: Efficacy of Integrated Risk Score Using Omics-Based Biomarkers for the Prediction of Acute Rejection in Kidney Transplantation: A Randomized Prospective Pilot Study
Source: MDPI journal article supplement (doi:10.3390/ijms25105139), 2024-05-09

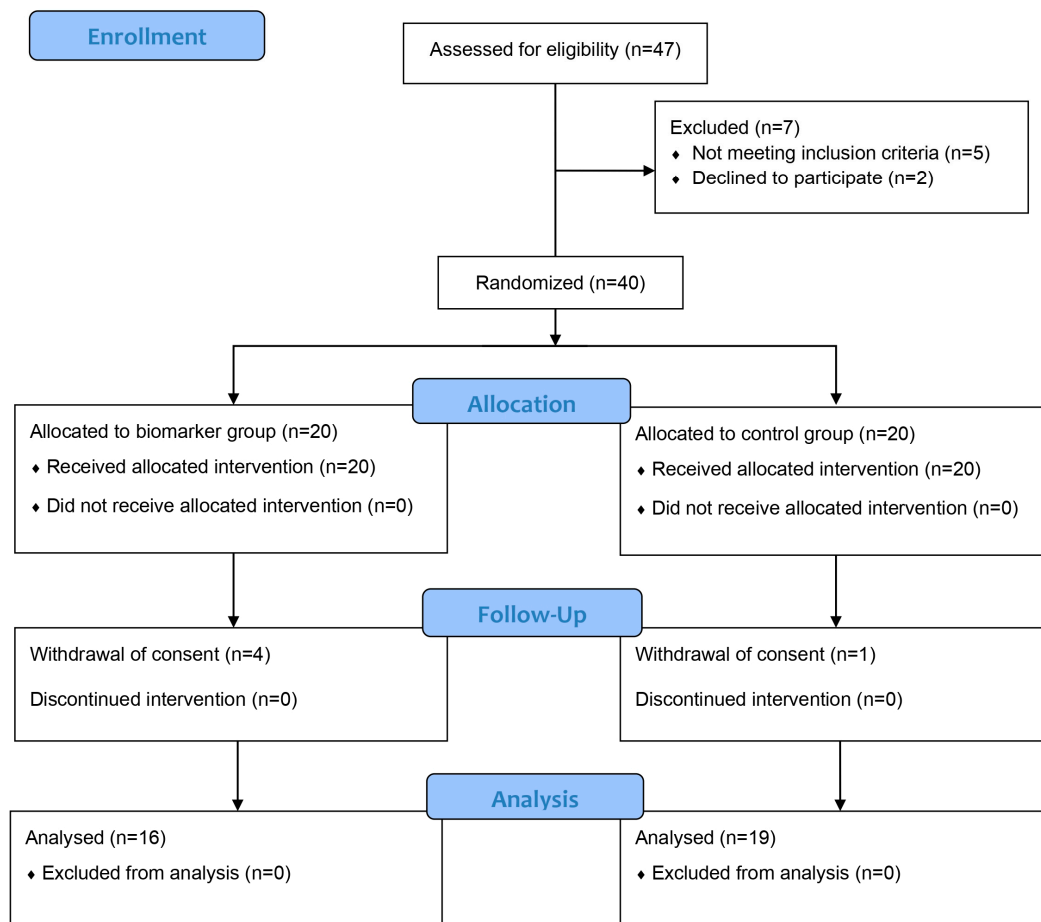

Figure S1. Flow diagram of the study.

Supplement: s1 [file s1]
